# Supplementary material
Source: PubMed Central journal article supplement (PMC9194616)
Supplement: djac055_supplementary_data.pdf [file djac055_supplementary_data.pdf]

## SUPPLEMENTARY MATERIAL

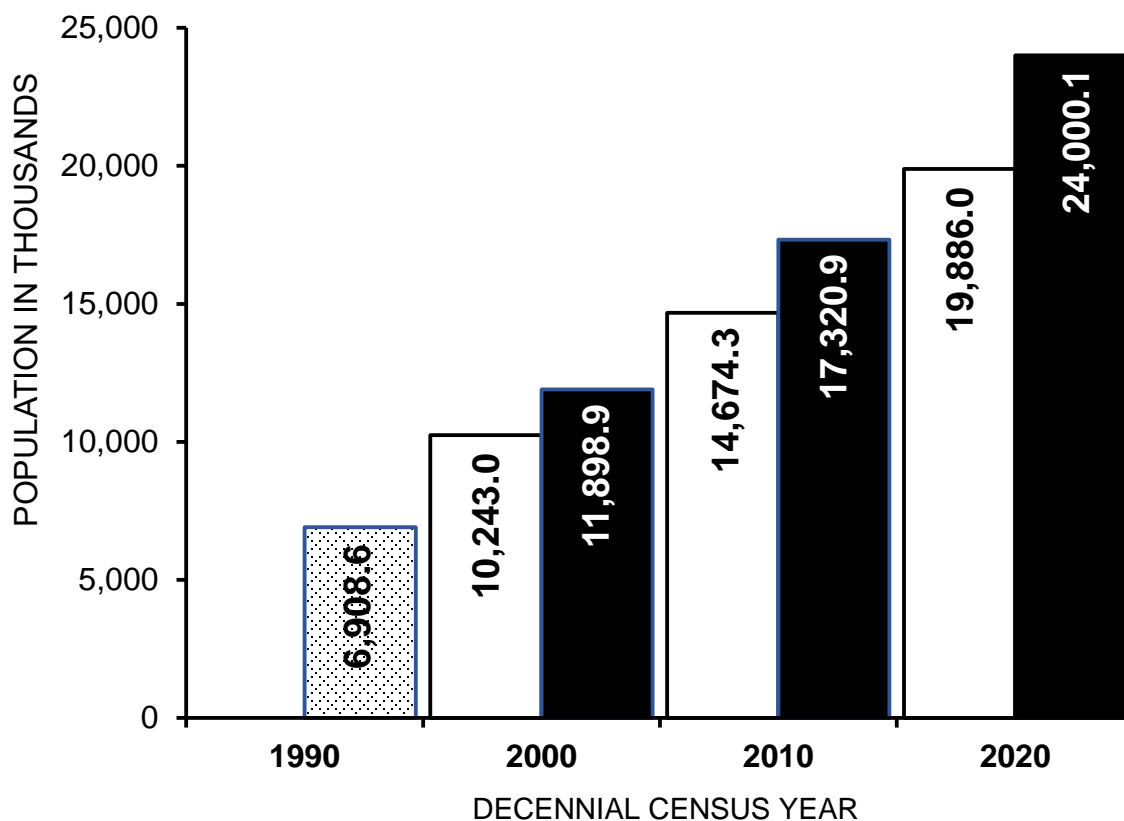

**Supplementary Figure 1.** Asian American populations have been the fastest-growing US racial population over the past three decades. From 1990 to 2000 the growth of US Asian populations ranged from 48 percent to 72 percent (1-3). In the 1990 Census, individuals were identified by a single race; for example, “Asian American” (dotted bar) (1). Beginning with Census 2000, individuals were allowed to select more than one race category, thus the Census Bureau began reporting racial and ethnic population numbers by two identifiers, e.g., “Asians alone” (white bar), and “Asians alone or in combination” (black bar). Due to these changes, Census 2000 population numbers by race cannot be directly compared to 1990 Census numbers (2,3).] From 2000 to 2010 the Asian alone population increased 43.3%, and the Asian alone or in combination population increased 45.6% (4). From 2010 to 2020, US Asian alone, and Asian alone or in combination populations increased 35.5% and 38.6%, respectively (4,5).

## SUPPLEMENTARY MATERIAL

### References

1. US Census Bureau. We the Americans: Asians, Report Number WE-3. Issued September 1993.
2. Barnes JS, Bennett CE. The Asian population: 2000. Census 2000, Brief C2KBR/01-16, issued February 2002. US Census Bureau..
3. Reeves TJ, Bennett CL. We the people: Asians in the United States. Census 2000 Special Report, CENSR-17, US Census Bureau. Issued December 2004.
4. Hoeffel EM, Rastogi S, Kim MO, Shahid H: The Asian population: 2010. 2010 Census Brief C2010BR-11, US Census Bureau. Issued March 2012.
5. US Census Bureau. Race and ethnicity in the United States: 2010 and 2020 Census. Published August 12, 2021. [Source: 2010 Census Redistricting Data (Public Law 94-171) Summary File; 2020 Census Redistricting Data (Public Law 94-171) Summary File; U.S. Census Bureau.]
